# Supplementary material for: Infections in Children Aged 6 Months to 5 Years Treated with Dupilumab in a Placebo-Controlled Clinical Trial of Moderate-to-Severe Atopic Dermatitis
Source: PubMed Central journal article supplement — Paediatr Drugs. 2024 Jan 24;26(2):163–73. doi: 10.1007/s40272-023-00611-9 (PMC10890978; doi:10.1007/s40272-023-00611-9), 2024-01-24
Supplement: 40272_2023_611_MOESM1_ESM.pdf [file 40272_2023_611_MOESM1_ESM.pdf]

# **Infections in Children Aged 6 Months to 5 Years Treated With Dupilumab in a Placebo-Controlled Clinical Trial of Moderate-to-Severe Atopic Dermatitis**

## **Pediatric Drugs**

Amy S. Paller, Elaine C. Siegfried, Michael J. Cork, Peter D. Arkwright, Lawrence F. Eichenfield, Michele Ramien, Faisal A. Khokhar, Zhen Chen, Annie Zhang, Sonya L. Cyr

**Corresponding author:** Sonya Cyr  
Regeneron Pharmaceuticals Inc., 1 Rockwood Road, Sleepy Hollow, NY 10591  
sonya.cyr@regeneron.com

## **SUPPORTING INFORMATION**

- 1. Table S1. Exposure-Adjusted Numbers of Patients With  $\geq 2$  Treatment-Emergent Infections During the Study Treatment Period**
- 2. Table S2. Treatment-Emergent Recurrent Infections ( $\geq 2$  events, by MedDRA PT, under SOC 'Infections and Infestations') by Incidence Rate: Number of Patients per 100 PY**
- 3. Table S3. Number of Patients With Concomitant Systemic Anti-Infectives**

**Table S1. Exposure-Adjusted Numbers of Patients With ≥ 2 Treatment-Emergent Infections During the Study Treatment Period**

|                                                               | Patients with ≥2 events, nP/PY (nP/100 PY) |                                         | RR vs placebo (95%CI), P value   |
|---------------------------------------------------------------|--------------------------------------------|-----------------------------------------|----------------------------------|
|                                                               | Placebo + TCS (n = 78)                     | Dupilumab 200/300 mg q4w + TCS (n = 83) |                                  |
| Total infections (SOC)                                        | 20/19.4 (103.1)                            | 7/23.7 (29.5)                           | 0.29 (0.12-0.68)<br><b>0.004</b> |
| Infections leading to treatment discontinuation (SOC)         | 0/24.0                                     | 0/25.8                                  | NE (NE-NE)<br>NE                 |
| Serious or severe infections                                  | 0/24.0                                     | 0/25.8                                  | NE (NE-NE)<br>NE                 |
| Adjudicated skin infections (excluding herpes infections)     | 10/21.7 (46.0)                             | 1/25.5 (3.9)                            | 0.09 (0.01-0.67)<br><b>0.019</b> |
| Non-skin infections <sup>1</sup>                              | 14/20.6 (67.9)                             | 5/24.4 (20.5)                           | 0.30 (0.11-0.84)<br><b>0.021</b> |
| Herpes viral infections (HLT)                                 | 0/24.0                                     | 0/25.8                                  | NE (NE-NE)<br>NE                 |
| Bacterial infections (HLGT)                                   | 5/22.8 (21.9)                              | 0/25.8                                  | NE (NE-NE)<br>NE                 |
| Viral infections (HLGT)                                       | 1/23.7 (4.2)                               | 0/25.8                                  | NE (NE-NE)<br>NE                 |
| Fungal infections (HLGT)                                      | 0/24.0                                     | 0/25.8                                  | NE (NE-NE)<br>NE                 |
| Helminthic infections (HLGT)                                  | 0/24.0                                     | 0/25.8                                  | NE (NE-NE)<br>NE                 |
| Skin structures and soft tissue infections (HLT) <sup>2</sup> | 3/23.3 (12.9)                              | 0/25.8                                  | NE (NE-NE)<br>NE                 |

1. Includes all adverse events in the SOC 'Total infections' except adjudicated non-herpetic skin infections and the HLT 'Herpes viral infections'

2. Only includes infections that fall within HLGT category of 'pathogens unspecified'

Abbreviations: CI, confidence interval; HLGT, MedDRA High Level Group Term; HLT, MedDRA High Level Term; MedDRA, Medical Dictionary for Regulatory Activities; NE, not estimated; nP/100 PY, number of patients per 100 patient-years; PT, MedDRA Preferred Term; q4w, every 4 weeks; RR, rate ratio; SOC, MedDRA System Organ Class; TCS, topical corticosteroids.

**Table S2. Treatment-Emergent Recurrent Infections (≥ 2 events, by MedDRA PT, under SOC ‘Infections and Infestations’) by Incidence Rate: Number of Patients per 100 PY**

| Preferred Term (PT)                     | Patients with ≥2 events, nP/PY (nP/100 PY) |                                         |
|-----------------------------------------|--------------------------------------------|-----------------------------------------|
|                                         | Placebo + TCS (n = 78)                     | Dupilumab 200/300 mg q4w + TCS (n = 83) |
| Nasopharyngitis                         | 1/23.8 (4.2)                               | 1/25.5 (3.9)                            |
| Upper respiratory tract infection       | 1/23.7 (4.2)                               | 0/25.8                                  |
| Molluscum contagiosum                   | 0/24.0                                     | 0/25.8                                  |
| Conjunctivitis                          | 0/24.0                                     | 0/25.8                                  |
| Gastroenteritis viral                   | 0/24.0                                     | 0/25.8                                  |
| Impetigo                                | 1/23.8 (4.2)                               | 0/25.8                                  |
| Herpes virus infection                  | 0/24.0                                     | 0/25.8                                  |
| Varicella                               | 0/24.0                                     | 0/25.8                                  |
| Bronchitis                              | 0/24.0                                     | 0/25.8                                  |
| COVID-19                                | 0/24.0                                     | 0/25.8                                  |
| Cellulitis                              | 0/24.0                                     | 0/25.8                                  |
| Coronavirus infection                   | 0/24.0                                     | 0/25.8                                  |
| Croup infectious                        | 0/24.0                                     | 0/25.8                                  |
| Dermatitis infected                     | 0/24.0                                     | 0/25.8                                  |
| Keratitis viral                         | 0/24.0                                     | 0/25.8                                  |
| Oral herpes                             | 0/24.0                                     | 0/25.8                                  |
| Otitis media                            | 0/24.0                                     | 0/25.8                                  |
| Otitis media acute                      | 1/23.7 (4.2)                               | 0/25.8                                  |
| Paronychia                              | 1/23.8 (4.2)                               | 0/25.8                                  |
| Pustule                                 | 0/24.0                                     | 0/25.8                                  |
| Skin infection                          | 1/23.7 (4.2)                               | 0/25.8                                  |
| Respiratory tract infection viral       | 0/24.0                                     | 0/25.8                                  |
| Staphylococcal skin infection           | 1/23.7 (4.2)                               | 0/25.8                                  |
| Ear infection                           | 0/24.0                                     | 0/25.8                                  |
| Skin bacterial infection                | 2/23.5 (8.5)                               | 0/25.8                                  |
| Viral upper respiratory tract infection | 0/24.0                                     | 0/25.8                                  |
| Abscess limb                            | 0/24.0                                     | 0/25.8                                  |
| Cellulitis staphylococcal               | 0/24.0                                     | 0/25.8                                  |
| Eczema herpeticum                       | 0/24.0                                     | 0/25.8                                  |
| Furuncle                                | 1/23.8 (4.2)                               | 0/25.8                                  |

|                                       |        |        |
|---------------------------------------|--------|--------|
| Gastroenteritis                       | 0/24.0 | 0/25.8 |
| Genital candidiasis                   | 0/24.0 | 0/25.8 |
| Herpes simplex                        | 0/24.0 | 0/25.8 |
| Pharyngitis                           | 0/24.0 | 0/25.8 |
| Respiratory syncytial virus infection | 0/24.0 | 0/25.8 |
| Staphylococcal abscess                | 0/24.0 | 0/25.8 |
| Staphylococcal bacteremia             | 0/24.0 | 0/25.8 |
| Staphylococcal infection              | 0/24.0 | 0/25.8 |
| Superinfection                        | 0/24.0 | 0/25.8 |

Abbreviations: MedDRA, Medical Dictionary for Regulatory Activities; nP/100 PY, number of patients per 100 patient-years; PT, MedDRA Preferred Term; q4w, every 4 weeks; SOC, MedDRA System Organ Class; TCS, topical corticosteroids.

**Table S3. Number of Patients With Concomitant Systemic Anti-Infectives**

| Preferred Term                                                      | Placebo + TCS (N = 78)<br>nP/PY (nP/100 PY) | Dupilumab 200/300 mg q4w + TCS<br>(N = 83)<br>nP/PY (nP/100 PY) |
|---------------------------------------------------------------------|---------------------------------------------|-----------------------------------------------------------------|
| Systemic Anti-Infectives                                            | 32/15.8 (203.0)                             | 21/20.0 (104.7)                                                 |
| Cefalexin (antibacterial)                                           | 11/21.3 (51.6)                              | 6/24.0 (25.0)                                                   |
| Clindamycin (antibacterial)                                         | 8/21.6 (37.0)                               | 5/24.2 (20.6)                                                   |
| Acyclovir (antiviral)                                               | 4/23.4 (16.2)                               | 4/24.8 (16.1)                                                   |
| Amoxicillin (antibacterial)                                         | 5/23.0 (21.7)                               | 3/25.2 (11.9)                                                   |
| Sulfamethoxazole; Trimethoprim<br>(antibacterial)                   | 5/22.8 (21.9)                               | 3/25.0 (12.0)                                                   |
| Cefdinir (antibacterial)                                            | 5/22.8 (22.0)                               | 2/25.3 (7.9)                                                    |
| Amoxicillin trihydrate;<br>clavulanate potassium<br>(antibacterial) | 0/24.0                                      | 1/25.5 (3.9)                                                    |
| Azithromycin (antibacterial)                                        | 0/24.0                                      | 1/25.5 (3.9)                                                    |
| Cefadroxil (antibacterial)                                          | 1/23.7 (4.2)                                | 1/25.5 (3.9)                                                    |
| Ceftriaxone (antibacterial)                                         | 0/24.0                                      | 1/25.5 (3.9)                                                    |
| Inosine pranobex (antiviral)                                        | 1/23.9 (4.2)                                | 1/25.6 (3.9)                                                    |
| Linezolid (antibacterial)                                           | 2/23.6 (8.5)                                | 1/25.7 (3.9)                                                    |
| Vancomycin (antibacterial)                                          | 1/23.9 (4.2)                                | 1/25.5 (3.9)                                                    |
| Flucloxacillin (antibacterial)                                      | 3/23.7 (12.7)                               | 0/25.8                                                          |
| Amoxicillin; Clavulanic acid<br>(antibacterial)                     | 2/23.5 (8.5)                                | 0/25.8                                                          |
| Clarithromycin (antibacterial)                                      | 2/23.5 (8.5)                                | 0/25.8                                                          |
| Valacyclovir (antiviral)                                            | 2/23.4 (8.6)                                | 0/25.8                                                          |
| Cefazolin (antibacterial)                                           | 1/23.7 (4.2)                                | 0/25.8                                                          |
| Ciprofloxacin (antibacterial)                                       | 1/23.9 (4.2)                                | 0/25.8                                                          |
| Doxycycline (antibacterial)                                         | 1/23.9 (4.2)                                | 0/25.8                                                          |
| Erythromycin (antibacterial)                                        | 1/23.7 (4.2)                                | 0/25.8                                                          |
| Fluconazole (antifungal)                                            | 1/23.7 (4.2)                                | 0/25.8                                                          |
| Immunoglobulin human normal                                         | 1/23.7 (4.2)                                | 0/25.8                                                          |
| Roxithromycin (antibacterial)                                       | 1/23.7 (4.2)                                | 0/25.8                                                          |

Abbreviations: MedDRA, Medical Dictionary for Regulatory Activities; nP/100 PY, number of patients per 100 patient-years; q4w, every 4 weeks; TCS, topical corticosteroids.
